# Supplementary material for: Ovarian Cancer Exosomes Trigger Differential Biophysical Response in Tumor-Derived Fibroblasts
Source: PubMed Central journal article supplement (PMC7250846; doi:10.1038/s41598-020-65628-3), 2020-05-26
Supplement: 41598_2020_65628_MOESM1_ESM.pdf [file 41598_2020_65628_MOESM1_ESM.pdf]

# Ovarian Cancer Exosomes Trigger Differential Biophysical Response in Tumor-Derived Fibroblasts

Amy H. Lee<sup>1</sup>, Deepraj Ghosh<sup>2</sup>, Nhat Quach<sup>2</sup>, Devin Schroeder<sup>2</sup>, Michelle R. Dawson<sup>\*1,2</sup>

1. Brown University, School of Engineering, Center for Biomedical Engineering, Providence, RI, 02912, USA.

2. Brown University, Department of Molecular Pharmacology, Physiology, and Biotechnology, Providence, RI, 02912, USA.

\* Correspondence addressed to [michelle\\_dawson@brown.edu](mailto:michelle_dawson@brown.edu)

# Supplemental Figure 1

**CD90**

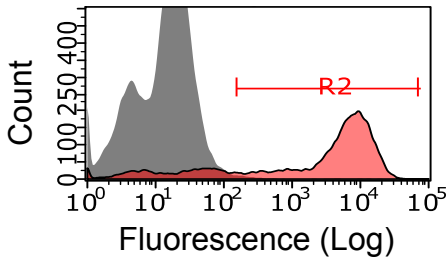

**CD73**

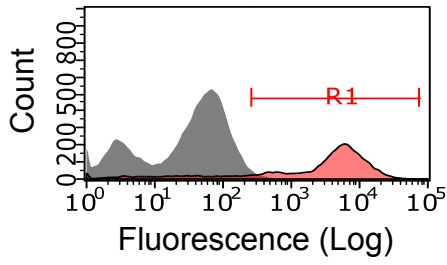

**CD105**

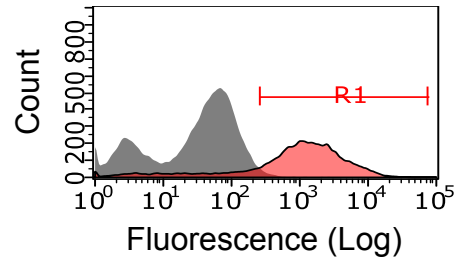

**CD44**

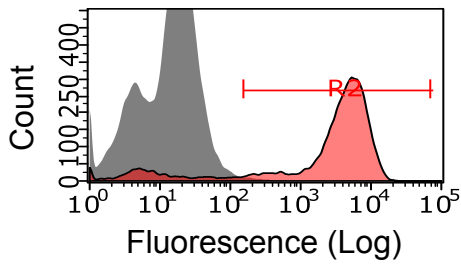

**CD29**

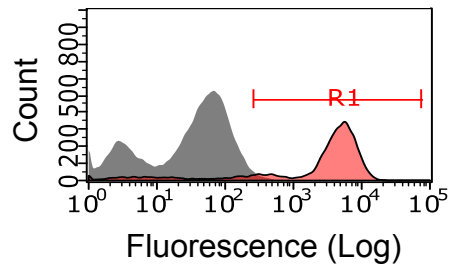

**CD31**

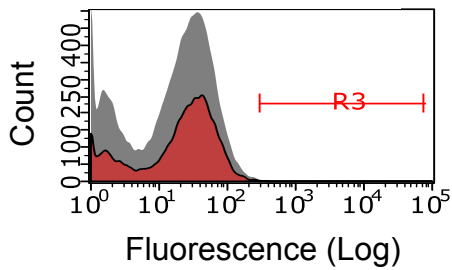

**CD45**

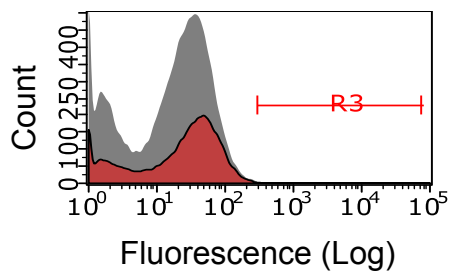

# Supplemental Table 1

| Pathways of Interest             | # miRNAs | Involved Genes                                                                                                  | Involved miRNAs                                                                                                                                                                                                                                                                                                                                                                            |
|----------------------------------|----------|-----------------------------------------------------------------------------------------------------------------|--------------------------------------------------------------------------------------------------------------------------------------------------------------------------------------------------------------------------------------------------------------------------------------------------------------------------------------------------------------------------------------------|
| Proteoglycans in Cancer          | 261      | CAMK2D, ACTB, ROCK1, SMAD2, CAV1, RHOA, AKT2, WNT5A, CD44                                                       | miR-7-1-3p, miR-940, miR-106b, let-7a-5p, let-7b-5p, let-7c-5p, let-7e-5p, let-7f-5p, let-7g-5p, let-7i-5p, miR-182-5p, miR-429, miR-195, miR-200b, miR-3613, miR-3714, miR-4470, miR-4728, miR-4668, miR-6768, miR-8063, miR-497, miR-513a-5p, miR-939-5p                                                                                                                                 |
| Pathways in Cancer               | 233      | PDGFRA, WNT16, TGFBR1, SMAD2, ROCK1, RHOA, CCNA1, Rac2, COL4A5, AKT2, MAPK3, FN1, CDK4, FOXO1, PTEN, JAK1, BRAF | miR-7-1-3p, let-7e-5p, let-7g-5p, let-7b-5p, let-7f-5p, let-7i-5p, miR-15a, miR-106b, miR-940, miR-182-5p, miR-200b, miR-429, miR-200c, miR-3613-3p, miR-3714, miR-1290, miR-6768-5p, miR-6876-5p, miR-939-5p, miR-664b-3p, miR-497, miR-513a-5p                                                                                                                                           |
| TGF-B Signaling                  | 154      | ROCK1, SMAD2, SMAD6, RhoA, PPP2CA, SMURF2, ACVR2A, BAMBI                                                        | miR-7-1-3p, miR-106b-5p, miR-940, miR-224-3p, miR-429, miR-195-5p, miR-301a-3p, miR-3613-3p, miR-3149, miR-8063, miR-664b, miR-494-3p, miR-940, miR-522-3p, let-7a-5p, let-7b-5p, let-7c-5p, let-7d-5p, let-7e-5p, let-7f-5p, let-7g-5p, let-7i-5p                                                                                                                                         |
| Wnt Signaling Pathway            | 249      | FZD7, CTNNBIP1, CAMK2D, Wnt2B, Wnt16, RhoA, SMAD4, VANGL1, Rac2, CCND2                                          | miR-7-1-3p, miR-15a-5p, miR-30b-5p, miR-30e-5p, miR-940, let-7a-5p, let-7b-5p, miR-26a-5p, has-miR195-5p, miR-182-5p, miR-205-5p, miR-224-3p, miR-3613-3p, miR-3619-5p, miR-4668-5p, miR-6124, miR-6876-5p, miR-6768-5p, miR-664b-3p, miR-497-5p, miR-513a-5p                                                                                                                              |
| Ras Signaling Pathway            | 274      | RASAL1, PRKCA, PDGFRA, KRAS, PAK1, FGF11, RAB5A, Rac2, PIK3CB, Akt3, FZD6, RhoA, MAPK9, CAMK2D                  | miR-7-1-3p, miR-30e-5p, miR-106b-5p, miR-15a-5p, miR-155-5p, miR-200b-3p, miR-224-3p, miR-429, miR-182-5p, miR-195-5p, miR-3613-3p, miR-1290, miR-3149, miR-6124, miR-4668-5p, miR-4728-5p, miR-4470, miR-6768-5p, miR-6756-5p, miR-8063, miR-8089, miR-7111, miR-513a-5p, miR-664b-3p, miR-497-5p, let-7a-5p, let-7b-5p, let-7c-5p, let-7d-5p, let-7e-5p, let-7f-5p, let-7g-5p, let-7i-5p |
| Focal Adhesions                  | 261      | ACTB, MYLK4, Rock1, COL4A5, RAF1, RhoA, FYN, CAV3, VCL, PAK3, ACTN1, PARVG, ITGA2, FN1, PXXN                    | miR-15a-5p, miR-8075, miR-7-1-3p, miR-940, let-7a-5p, miR-30e-5p, miR-429, miR-195-5p, miR-182-5p, miR-200b-3p, miR-3613-3p, miR-1290, miR-4728-5p, miR-4470, miR4668-5p, miR-6124, miR-6768-5p, miR6756-5p, miR-6165, miR-6808-5p, miR-8063, miR-664b-3p, miR-513a-5p, miR-497-5p, miR-1207-5p                                                                                            |
| Adherens Junction                | 233      | ACTN2, SMAD2, SNAI2, RHOA, CDH1, CTNND1, PVRL4, MAPK1, RAC1, WASF1                                              | miR-7-1-3p, miR-940, miR-182-5p, miR-205-5p, miR-3613-3p, miR-3714, miR-4668-5p, miR-4728-5p, miR-6893-5p, miR-6808, miR-8063, miR-940, miR-589-3p, let-7a-5p, let-7b-5p, let-7e-5p                                                                                                                                                                                                        |
| Regulation of Actin Cytoskeleton | 199      | ARPC5, PFN1, ACTN2, PGGFRA, MYLK4, VCL, MYH9, KRAS, FGF2, PAK6, FN1, ROCK2, PXXN                                | miR-182-5p, miR-224-3p, miR-429, miR-200b-3p, miR-195-5p, miR-3613-3p, miR-3714, miR-1290, miR-4668-5p, miR-4728-5p, miR-4689, miR-6124, miR-5196-5p, miR-6768-5p, miR-6876-5p, miR-6756-5p, miR8063, miR-8089, miR-8075, miR-664b-3p, miR-513a-5p, miR-940, miR-497-5p                                                                                                                    |

# Supplemental Figure 2

## CI-Exosomes vs. Cell Lysates

A.

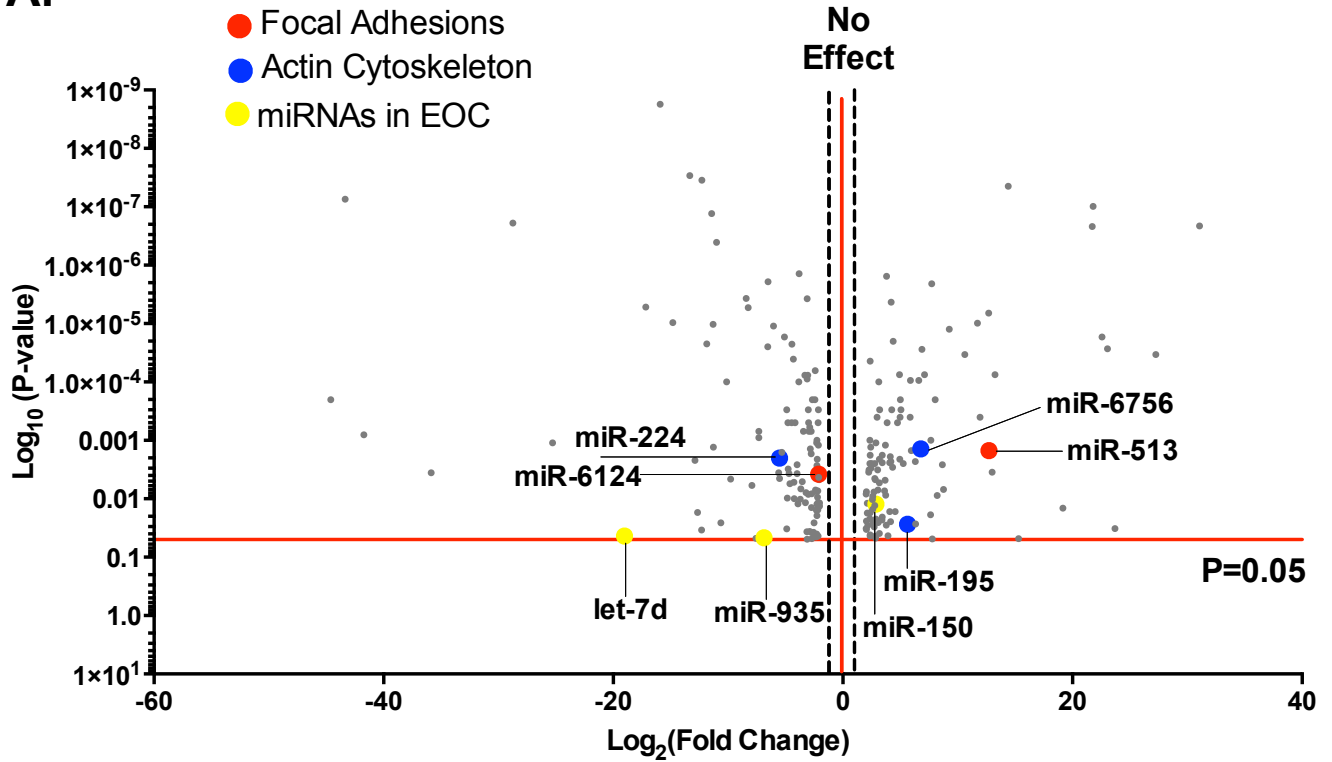

## SEC-Exosomes vs. Cell Lysates

B.

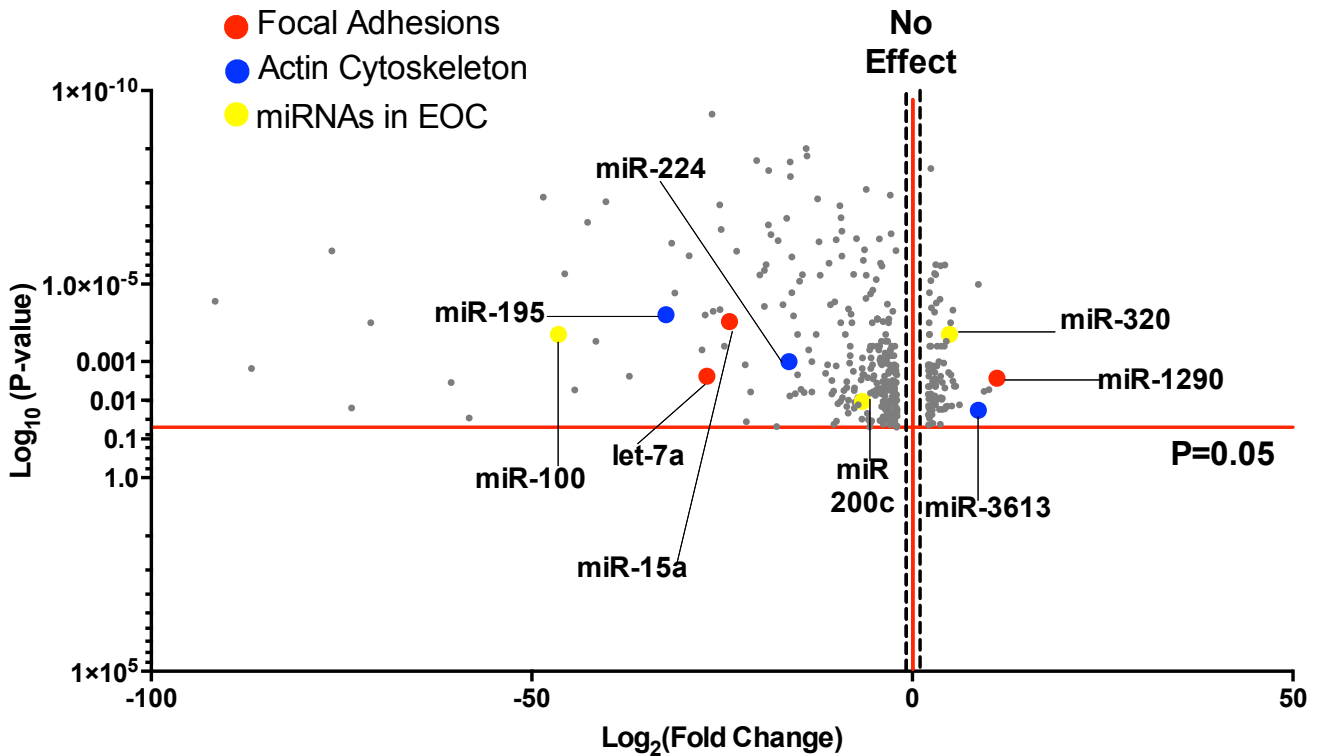

# Supplemental Figure 3

A.

Control

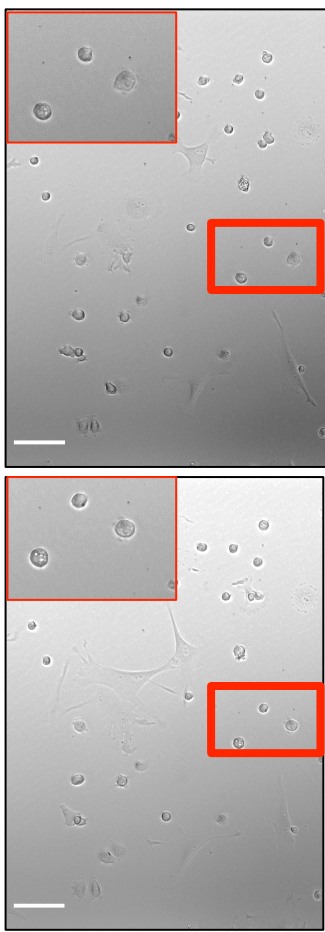

B.

CI-EXO

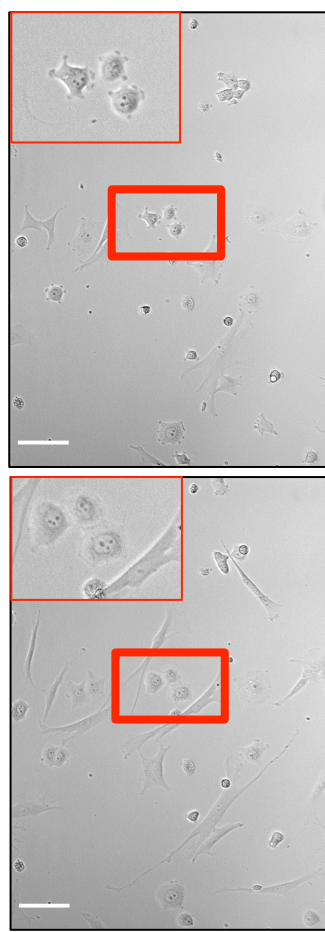

C.

SEC-EXO

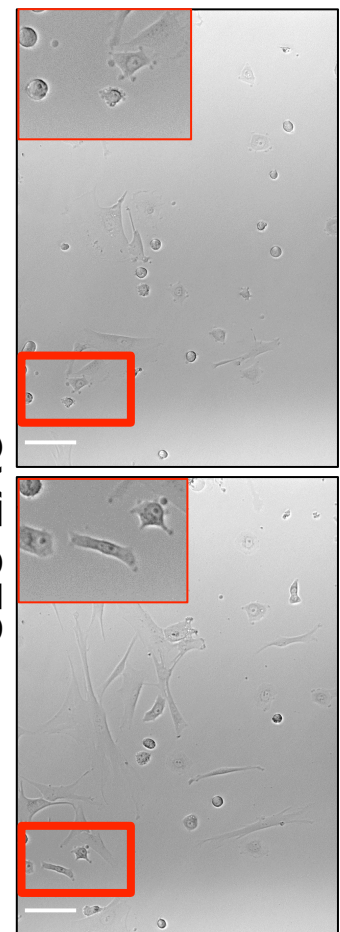

**Supplemental Table 2:**

**A.**

|                    | <b>Mean</b> | <b>Median</b> | <b>CV</b> |
|--------------------|-------------|---------------|-----------|
| <b>Control (I)</b> | 0.807192    | 0.833         | 0.126     |
| <b>Control (F)</b> | 0.760992    | 0.761         | 0.144     |
| <b>CI-EXO (I)</b>  | 0.768791    | 0.7945        | 0.145     |
| <b>CI-EXO (F)</b>  | 0.81214     | 0.826         | 0.104     |
| <b>SEC-EXO (I)</b> | 0.790073    | 0.8195        | 0.132     |
| <b>SEC-EXO (F)</b> | 0.714079    | 0.763         | 0.238     |

# Supplemental Figure 4

A.

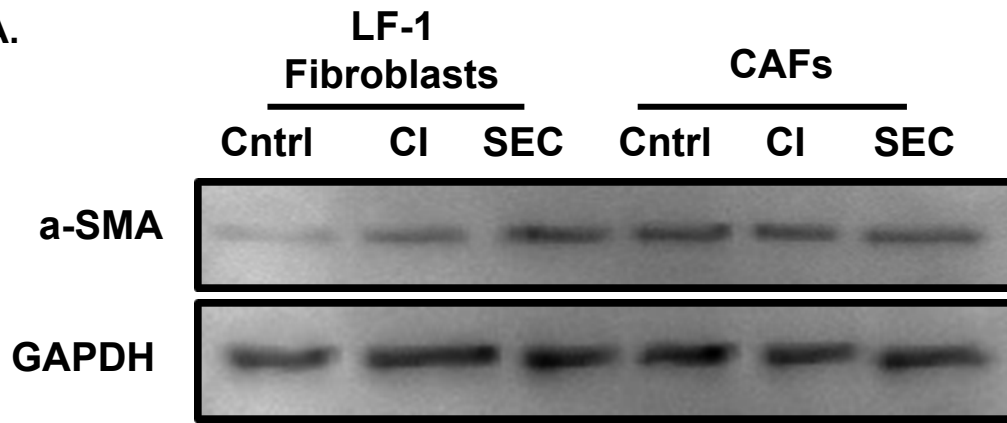

# Supplemental Figure 5

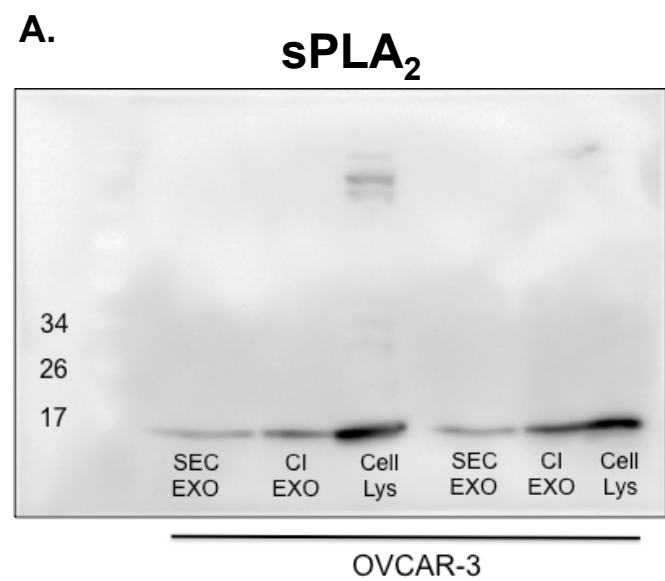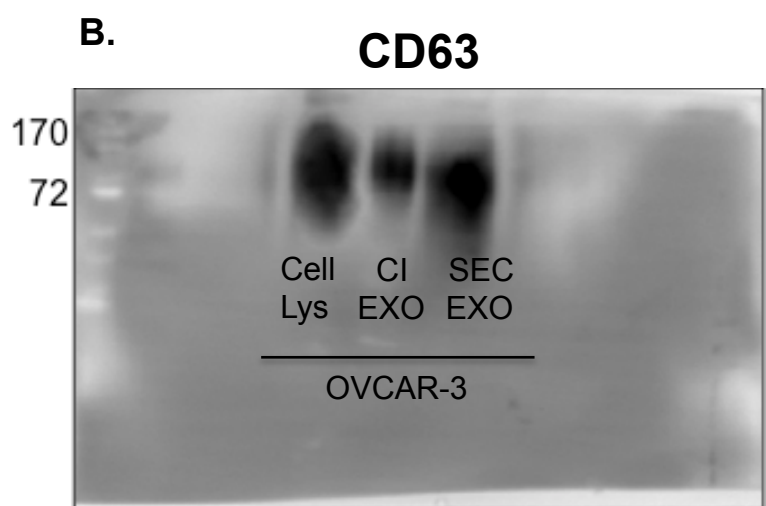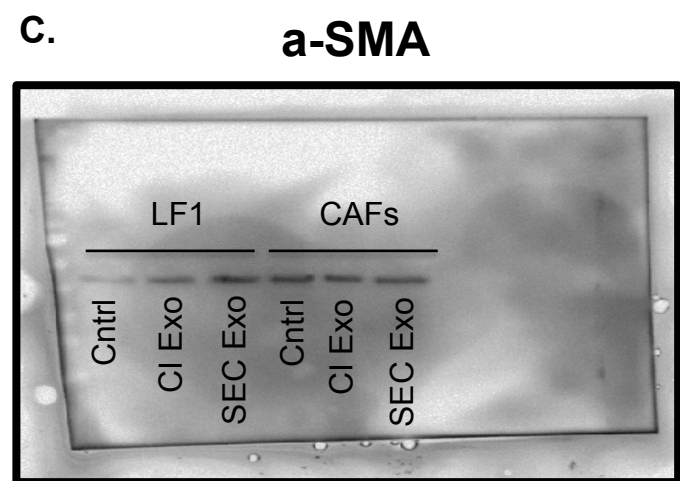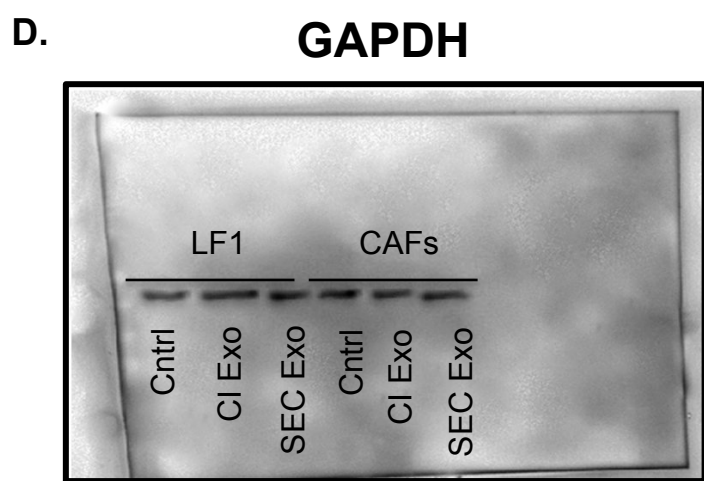



### Supplemental Table 3:

|       |                                  |
|-------|----------------------------------|
| MYL9  | F: ACC CCA CAG ACG AAT ACC TG    |
|       | R: AAA GGC GTT GCG AAT CAC AT    |
| RHOA  | F: TAT CGA GGT GGA TGG AAA GC    |
|       | R: TAT CGA GGT GGA TGG AAA GC    |
| ROCK1 | F: TTA CTG ACA GGG AAG TGA GGT T |
|       | R: AGG TAG TTG ATT GCC AAC GAAA  |
| ROCK2 | F: AAC AGG CAT GGT ACA TTG TGA T |
|       | R: GGAAA CAC CTA CAG ACC ACC     |
| 18s   | F: GTA ACC CGT TGA ACC CCA TT    |
|       | R: CCA TCC AAT CGG TAG TAG CG    |
